# Supplementary material
Source: Springer Nature journal article supplement (https://www.springermedizin.de/resource/supplementary/12943_2013_1524_MOESM1_ESM.pdf/9552454)

# Figure S1

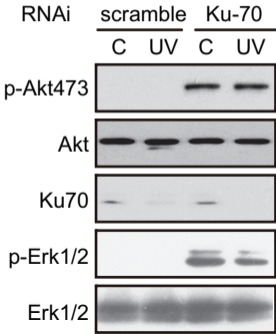

Supplement: MOESM1 [file 9552454]
